# Supplementary material for: Expression patterns of cysteine peptidase genes across the Tribolium castaneum life cycle provide clues to biological function
Source: PeerJ journal article supplement (doi:10.7717/peerj.1581), 2016-01-18

FigS4  
LOC659565, TC010999 (cathepsin L)

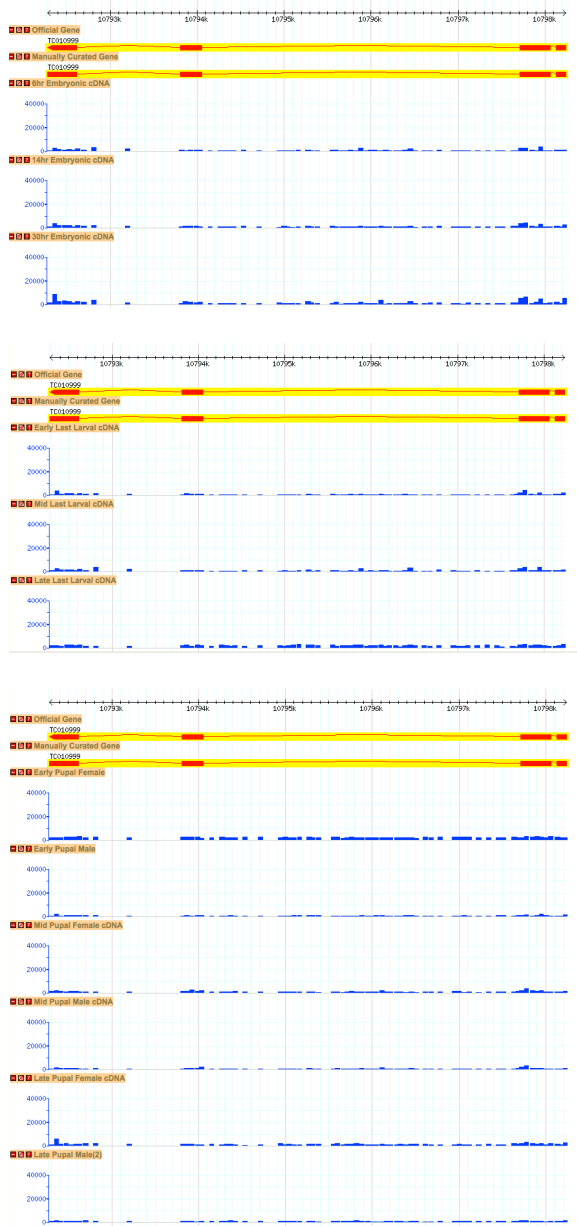

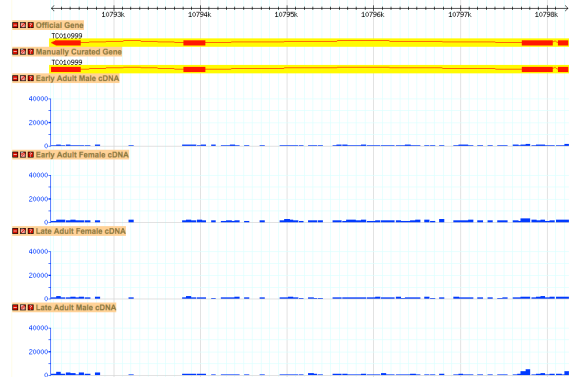

# LOC659502, TC011000 (cathepsin L)

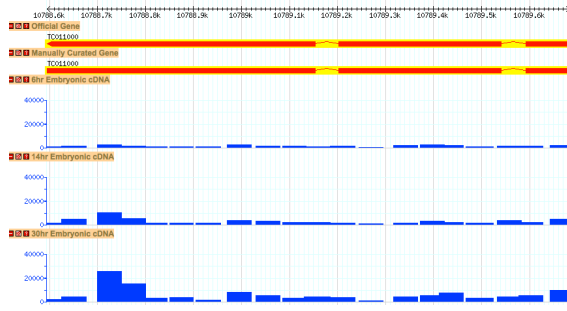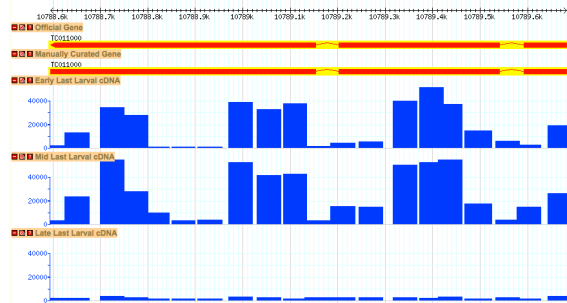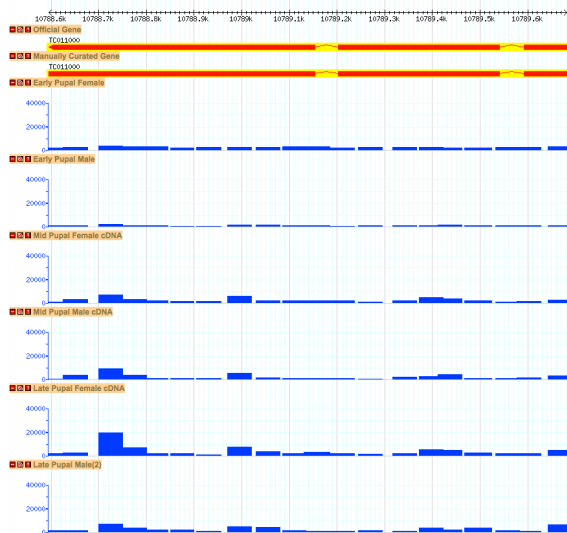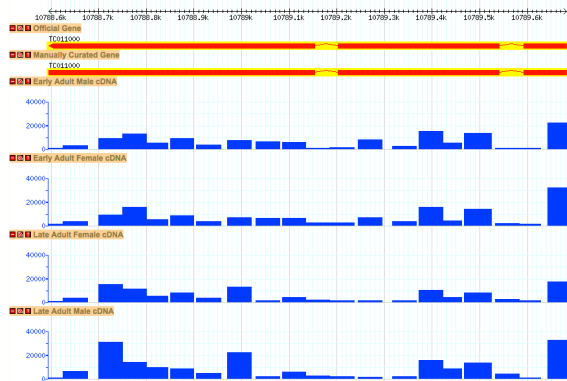

# LOC659441, TC011001 (cathepsin L)

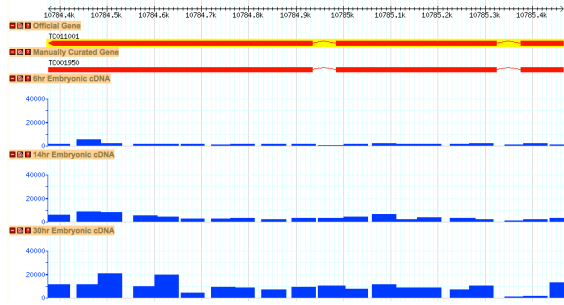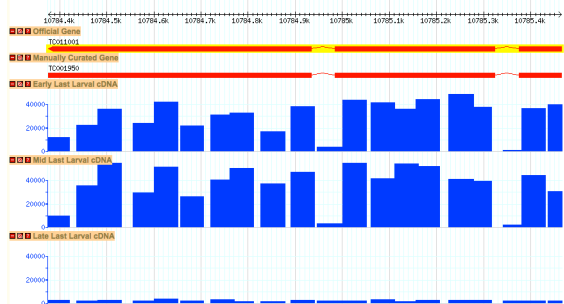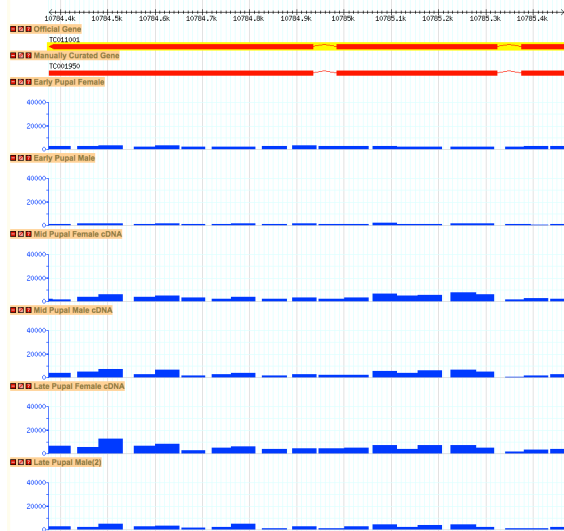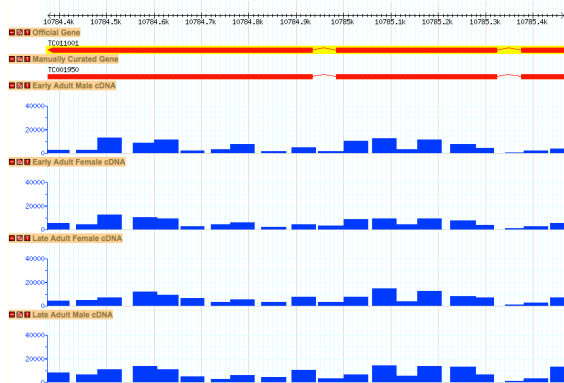

# LOC659367, TC011002 (cathepsin L homolog)

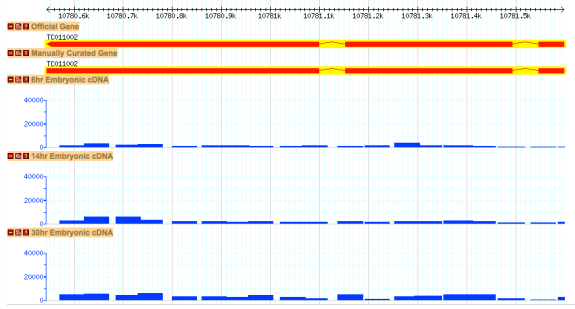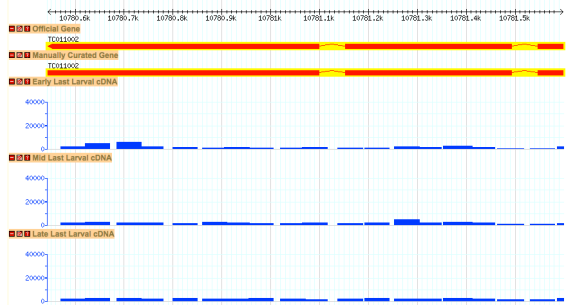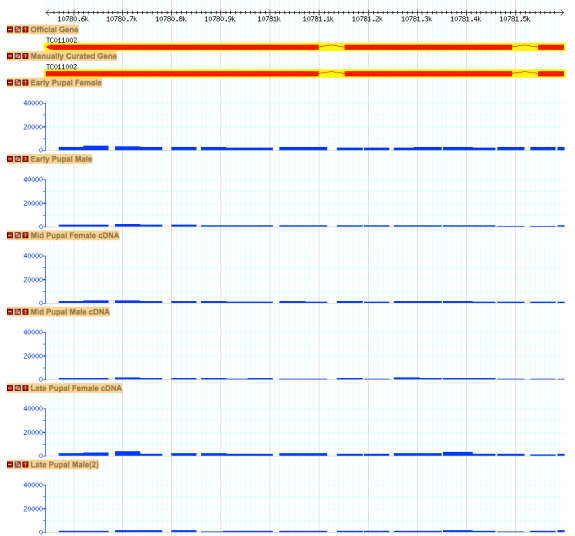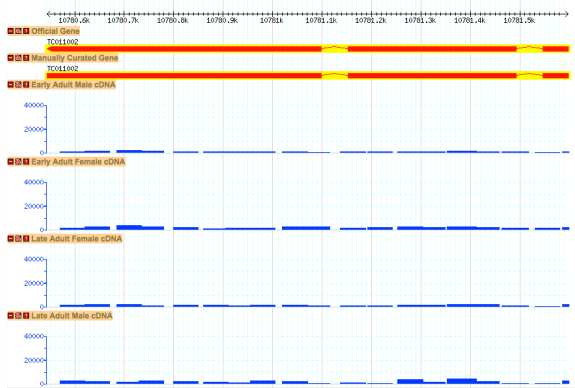

# LOC659367, TC011003 (cathepsin L)

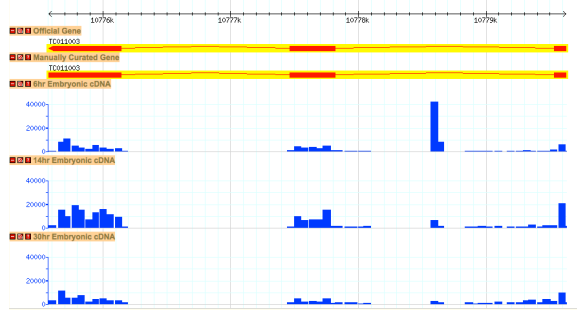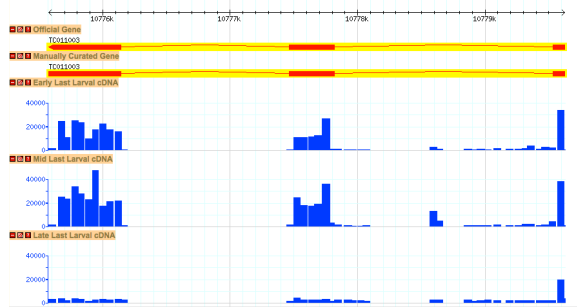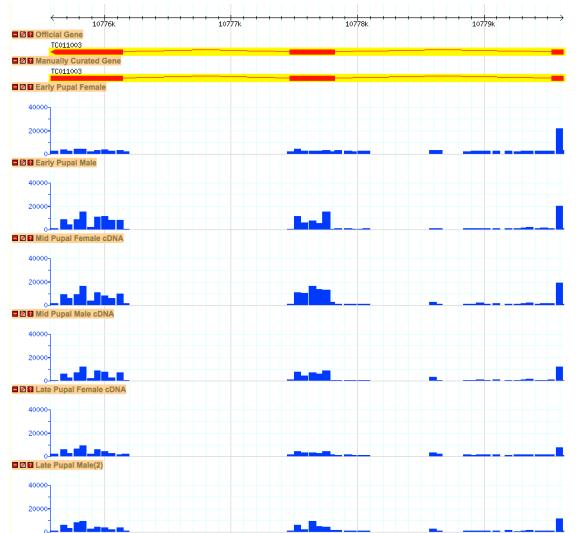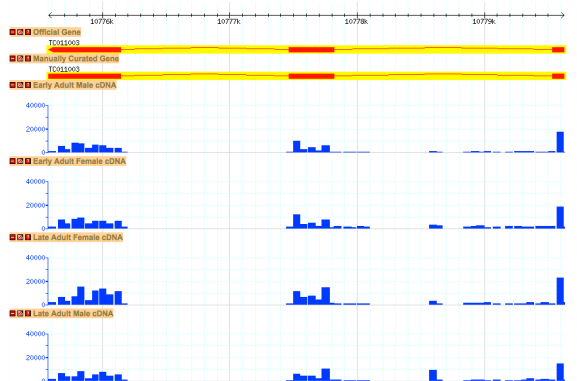

Supplement: Perkin_et_al_supplement_FigS4.pdf [file Perkin_et_al_supplement_FigS4.pdf]
