# Supplementary material for: Expression patterns of cysteine peptidase genes across the Tribolium castaneum life cycle provide clues to biological function
Source: PeerJ journal article supplement (doi:10.7717/peerj.1581), 2016-01-18
Supplement: Perkin_et_al_supplement_TableS3.pdf [file Perkin_et_al_supplement_TableS3.pdf]

Supplemental Table S3. iBeetle phenotypes. Data is the percent of individuals with the defined mortality/morphology out of 10 individuals. Blank boxes indicate information was not available. Primers are those used in the RNAi screen (<http://ibeetle-base.uni-goettingen.de>; Dönitz et al., 2015).

**LOC663066 B-like** Primers: left: GGCAGAAACCGGAATTGTAA right: GCTCTCAATCCCACATTCGT

|                   | Phenotype after larval injection |        |       |       | Phenotype after pupal injection |        |       |       |
|-------------------|----------------------------------|--------|-------|-------|---------------------------------|--------|-------|-------|
|                   | Egg                              | Larvae | Pupae | Adult | Egg                             | Larvae | Pupae | Adult |
| Mortality 11 days | -                                | 0%     | 0%    | 0%    | -                               | -      | 40%   | 40%   |
| Mortality 22 days | -                                | 0%     | 0%    | 0%    |                                 |        |       |       |
| Fertility         |                                  |        |       |       |                                 |        |       |       |
| Morphology        |                                  |        |       |       |                                 |        |       |       |

**LOC656957 B-like** Primers: left: TGTGGGTGTAAAGGGGGTTA right: TTCTTCTGTTCACCCTA

|                   | Phenotype after larval injection |        |       |       | Phenotype after pupal injection |        |       |       |
|-------------------|----------------------------------|--------|-------|-------|---------------------------------|--------|-------|-------|
|                   | Egg                              | Larvae | Pupae | Adult | Egg                             | Larvae | Pupae | Adult |
| Mortality 11 days | -                                | 10%    | 10%   | 10%   | -                               | -      | 0%    | 0%    |
| Mortality 22 days | -                                | 10%    | 10%   | 10%   |                                 |        |       |       |
| Fertility         |                                  |        |       |       |                                 |        |       |       |
| Morphology        |                                  |        |       |       |                                 |        |       |       |

**LOC656198 B homolog** Primers: left: GCCAATTATGGATGGAGTGC right: GGTCAACATTGGTCGGAAGT

|                   | Phenotype after larval injection |        |       |                        | Phenotype after pupal injection |                                |       |       |
|-------------------|----------------------------------|--------|-------|------------------------|---------------------------------|--------------------------------|-------|-------|
|                   | Egg                              | Larvae | Pupae | Adult                  | Egg                             | Larvae                         | Pupae | Adult |
| Mortality 11 days | -                                | 0%     | 0%    | 0%                     |                                 |                                | 0%    | 0%    |
| Mortality 22 days | -                                | 20%    | 20%   | 20%                    |                                 |                                |       |       |
| Fertility         |                                  |        |       |                        |                                 |                                |       |       |
| Morphology        |                                  |        |       | Eclosion not fulfilled | No cuticle (30%)                | Irregular musculature (50-80%) |       |       |

**LOC657117 B homolog** Primers: left: CAAGCGACCCAAAACGTAAT right: ATAGACATCGAAGGCGGCTA

|                   | Phenotype after larval injection |        |       |       | Phenotype after pupal injection |        |       |                        |
|-------------------|----------------------------------|--------|-------|-------|---------------------------------|--------|-------|------------------------|
|                   | Egg                              | Larvae | Pupae | Adult | Egg                             | Larvae | Pupae | Adult                  |
| Mortality 11 days | -                                | 0%     | 0%    | 0%    | -                               | -      | 10%   | 10%                    |
| Mortality 22 days | -                                | 0%     | 0%    | 0%    | -                               | -      |       |                        |
| Fertility         |                                  |        |       |       |                                 |        |       |                        |
| Morphology        |                                  |        |       |       |                                 |        |       | Eclosion not fulfilled |

**LOC663145 B** Primers: left: GGCAGAAACCGGAATTGTAA right: GCTCTCAATCCCACATTCGT

|                   | Phenotype after larval injection |        |       |       | Phenotype after pupal injection |        |       |       |
|-------------------|----------------------------------|--------|-------|-------|---------------------------------|--------|-------|-------|
|                   | Egg                              | Larvae | Pupae | Adult | Egg                             | Larvae | Pupae | Adult |
| Mortality 11 days | -                                | 0%     | 0%    | 0%    | -                               | -      | 10%   | 10%   |
| Mortality 22 days | -                                | 0%     | 0%    | 0%    | -                               | -      |       |       |
| Fertility         |                                  |        |       |       |                                 |        |       |       |
| Morphology        |                                  |        |       |       | Without cuticle<br>(30-50%)     |        |       |       |

**LOC663090 B** Primers: left: GATACATGATGGCTGCGTTC right: CAATCCCACATTCATTTTTGC

|                   | Phenotype after larval injection |        |       |       | Phenotype after pupal injection |        |       |       |
|-------------------|----------------------------------|--------|-------|-------|---------------------------------|--------|-------|-------|
|                   | Egg                              | Larvae | Pupae | Adult | Egg                             | Larvae | Pupae | Adult |
| Mortality 11 days | -                                | 0%     | 0%    | 0%    | -                               | -      | 0%    | 0%    |
| Mortality 22 days | -                                | 0%     | 0%    | 0%    | -                               | -      |       |       |
| Fertility         |                                  |        |       |       |                                 |        |       |       |
| Morphology        |                                  |        |       |       |                                 |        |       |       |

**LOC660368 L** Primers: left: AGTACTGGCGCCATTGAATC right: CCCTTATTCCTGGCGATTTT

|                   | Phenotype after larval injection |        |       |       | Phenotype after pupal injection |        |       |                                                                                                                                 |
|-------------------|----------------------------------|--------|-------|-------|---------------------------------|--------|-------|---------------------------------------------------------------------------------------------------------------------------------|
|                   | Egg                              | Larvae | Pupae | Adult | Egg                             | Larvae | Pupae | Adult                                                                                                                           |
| Mortality 11 days | -                                | 100%   | 100%  |       | -                               | -      | 10%   | 10%                                                                                                                             |
| Mortality 22 days | -                                | 100%   | 100%  | 100%  | -                               | -      |       |                                                                                                                                 |
| Fertility         |                                  |        |       |       |                                 |        |       | Vitellarium thinner (40%)<br>Vitellogenic egg chamber not present (40%)<br>Previtellogenic egg chamber mostly not present (40%) |
| Morphology        |                                  |        |       |       |                                 |        |       |                                                                                                                                 |

**LOC659226 L** Primers: left: CCACAAAGTCGCCAAACATA right: CATTCTCGTCTTCGGCTTT

|                   | Phenotype after larval injection |        |                  |                     | Phenotype after pupal injection             |        |                     |       |
|-------------------|----------------------------------|--------|------------------|---------------------|---------------------------------------------|--------|---------------------|-------|
|                   | Egg                              | Larvae | Pupae            | Adult               | Egg                                         | Larvae | Pupae               | Adult |
| Mortality 11 days | -                                | 20%    | 20%              |                     | -                                           | -      | 0%                  | 0%    |
| Mortality 22 days | -                                | 30%    | 30%              | 30%                 | -                                           | -      |                     |       |
| Fertility         |                                  |        |                  | 30%                 |                                             |        |                     |       |
| Morphology        |                                  |        | Eclosion delayed | No living offspring | No cuticle (50-80%)<br>Not fertilized (30%) |        | Later than schedule |       |
